# Supplementary material for: Acute effects of MDMA on trust, cooperative behaviour and empathy: A double-blind, placebo-controlled experiment
Source: PubMed Central journal article supplement (PMC8155732; doi:10.1177/0269881120926673), 2020-06-15
Supplement: MDMA_Prosocial_Effects_Supplementary_revision_submission.pdf [file MDMA_Prosocial_Effects_Supplementary_revision_submission.pdf]

# Acute effects of MDMA on trust, cooperative behaviour and empathy: a double-blind, placebo-controlled experiment

A. BORISSOVA<sup>1,10</sup>, B. FERGUSON<sup>2</sup>, M.B. WALL<sup>1,3,4</sup>, C. MORGAN<sup>13</sup>, R.L. CARHART-HARRIS<sup>4,12</sup>, M. BOLSTRIDGE<sup>4</sup>, M.A.P. BLOOMFIELD<sup>1,8,9,10,11</sup>, T.M. WILLIAMS<sup>4</sup>, A. FEILDING<sup>5</sup>, K. MURPHY<sup>6</sup>, R.J. TYACKE<sup>4</sup>, D. ERRITZOE<sup>4,12</sup>, L. STEWART<sup>1</sup>, K. WOLFF<sup>7</sup>, D. NUTT<sup>4</sup>, H.V. CURRAN<sup>1</sup>, W. LAWN<sup>1</sup>.

## Supplementary Materials

### Methods

#### Participants

Medical screening involved routine blood tests, electrocardiogram, heart rate, blood pressure and brief neurological exam. The Mini International Neuropsychiatric Interview version 5 (MINI-5) was performed by an experienced psychiatrist to assess mental health. Additional exclusion criteria included a diagnosis of a psychiatric (ICD-10 or DSM-IV Axis I) requiring current psychological or pharmacological treatment, neurological or endocrine illnesses, a history of drug or alcohol dependence, having a Body Mass Index below 19 or above 24 and being a non-native English speaker. Participants with nicotine dependence were not excluded. Ethnicity was not recorded.

#### Assessments

##### **Empathic Stories Task**

This task aimed to assess emotional empathy by assessing participants' emotional reactions in response to stories with different emotional themes. Participants were given 6 different stories to read on each visit day. There were 2 "happy" themed stories, 2 "angry" themed stories, 2 "sad" themed stories. Stories were a one paragraph description of a situation. For

27 example, a “happy” story described a family reunion at an airport, a “sad” story described a  
28 family being in a car accident where one of the children died, an “angry” story described  
29 someone missing a flight due to train cancellations.

30 Participants were asked to rate how “good” (any positive emotion– for example happy,  
31 pleased, hopeful, cheerful) or “bad” (any negative emotion– for example unhappy, scared,  
32 angry, melancholic) the stories made them feel. These ratings relate to “implicit” emotional  
33 empathy – that is, amount of emotional arousal in response to stimuli (Mehrabian and  
34 Epstein, 1972; Dziobek et al., 2008). Participants were asked to rate their personal, “gut-  
35 feeling” reaction by picking a self-assessment manikin (SAM) best corresponding to the  
36 positivity or negativity of their emotion on a scale of 1 (most positive) to 9 (most negative).  
37 Self-assessment manikins have been found to be a good way of assessing emotional response  
38 (Bradley and Lang, 1994). This score of 1-9 was analysed as the dependent variable.

39 See Figure S1 for an example of the self-assessment Manikin scale used in the study.

40

#### 41 **Trust investment (Berg et al., 1995)**

42 Participants made a total of 20 decisions. Participants were told they had £500, which they  
43 could choose to invest in 20 different entrepreneurs, played by a computer. They were told  
44 all entrepreneurs were highly skilled, but not all were trustworthy. Participants were told  
45 they might be able to triple their original investment if they chose wisely, or that they may  
46 lose all their money if not. Participants could choose to not send any money and therefore  
47 keep their £500. They were shown the face of the individual running the business and asked  
48 to choose an amount that they wished to invest. Faces the participants were shown were  
49 computer generated with neutral expressions. Participants were told their goal was to  
50 maximise the amount of money they would keep. Participants were not given any feedback

51 on the outcome of each investment until the end of the task. Participants were told they  
52 would be paid the amount of money remaining after one randomly chosen trial, divided by  
53 100. This was added to the standard reimbursement they received for taking part. The  
54 'entrepreneurs' responses were pre-determined.

55

#### 56 **Cooperative behaviour games:**

57 Participants were told they were playing these games with all the other participants in the  
58 study. These tasks were done on paper. The tasks were organised as 'one-shot' games.  
59 Participants were told that one of their responses would be chosen at random and this would  
60 be paid to them in addition to their standard reimbursement for taking part.

61 **Dictator Game** (Hoffman et al., 1996): Every participant played the role of the  
62 'dictator' at both of their sessions, with another study participant (unknown to them) being  
63 affected by their decision. Participants completed one trial at each session. Both parties  
64 would receive the amount that the 'dictator' chose.

65 **Ultimatum Game** (Thaler, 1988; Guth and Tietz, 1990): For both roles, participants  
66 were told that their response to this game from one of their sessions would be randomly  
67 paired with another participants' and they would both receive the result of that decision.  
68 Every participant completed one trial as the proposer and one trial as the decider.

69 The following tasks have been shown to be sensitive to recreational MDMA: Trustworthy  
70 Face Rating, Dictator Game, Ultimatum Game (Stewart et al., 2014) and MDMA: Ultimatum  
71 Game (Gabay et al., 2019).

72 A task similar to our Trust Investment Task (Trust Game) used by Kosfeld et al. (2005) was  
73 sensitive to the effects of oxytocin. Their study did not include pictures of faces.

74 Participants were not trained on the tasks described in this report.

75 Results

76 Demographics

77 Table S1 reports participants' lifetime drug history. Data were missing for four participants,  
78 so we analysed 21 participants' data.

79 Task Results

80 See Table S2 for full task results.

81

82 Table S3 lists full statistics for all Mood & Symptom VAS analyses.

83 Subacute Mood & Symptom VAS and BDI

84 Table S4 lists all subacute Mood & Symptom VAS and questionnaire analyses.

85

86 Tasks results

### 87 **Empathic Stories Task**

88 The significant main effect of story Emotion reflected that 'Happy' stories led participants to  
89 feel more positive than 'Angry' stories ( $t_{20}=-9.011$ ,  $p<0.001$ , mean difference=-3.262, 95%  
90 CI: -4.207 to -2.317), and 'Sad' stories led to more negative feelings than both 'Happy'  
91 ( $t_{20}=10.174$ ,  $p<0.001$ , mean difference=4.619, 95% CI: 3.432 to 5.806) and 'Angry' stories  
92 ( $t_{20}=5.702$ ,  $p<0.001$ , mean difference=1.357, 95% CI: 0.735 to 1.979).

### 93 **Trustworthiness ratings of faces**

94 14 received MDMA at first visit, placebo at second visit; 10 received placebo at first visit,  
95 MDMA at second visit. After adding drug order, a significant Drug by Face Gender by Order  
96 interaction emerged ( $F_{1,22}=4.797$ ,  $p=0.039$ ,  $\eta_p^2=0.179$ ). Female faces were rated as more  
97 trustworthy than male faces under MDMA ( $t_{13}=2.21$ ,  $p=0.025$ , 95% CI: 0.041 to 0.547), but  
98 only for participants who received MDMA at their first visit. See Figure S2 for representation  
99 of this effect.

### 100 **Trust Investment Task**

101 13 received MDMA at first visit, placebo at second visit; eight received placebo at first visit,  
102 MDMA at second visit. After adding Order as an additional factor, we found a significant  
103 interaction between Drug and Order ( $F_{1,19}=11.923$ ,  $p=0.003$ ,  $\eta_p^2=0.386$ ). Exploration of the  
104 drug by order interaction showed that when participants received MDMA first they invested  
105 more money under the placebo condition than the MDMA condition, ( $t_{12}= 3.73$ ,  $p=0.001$ ,  
106 mean difference=1594.538, 95% CI: 700.225 to 2488.851). When participants received

107 placebo first, there was no significant difference in the amount of money invested between  
108 conditions ( $t_7=-1.461$ ,  $p=0.160$ , mean difference=-795.875, 95% CI: -1935.905 to 344.155).  
109 We also assessed an effect of Session Day. There was no interaction between Session Day and  
110 Order ( $F_{1,19}=1.331$ ,  $p=0.263$ ,  $\eta_p^2=0.065$ ), however there was a main effect of Session Day  
111 ( $F_{1,19}=11.923$ ,  $p=0.003$ ,  $\eta_p^2=0.386$ ) reflecting a higher amount invested at the second session  
112 than the first session ( $t_{20}=3.453$ ,  $p=0.003$ , mean difference=1195.207, 95% CI: 470.730 to  
113 1919.683).

#### 114 Correlations

115 We found no significant correlations between plasma MDMA levels and task performance.  
116 We note a negative correlation between emotional ratings on “Sad” stories and plasma  
117 MDMA levels at two hours, which was significant at trend level ( $r=-0.550$ ,  $p=0.015$ ). This  
118 correlation reflects a less negative emotional response to stories with a “Sad” valence as  
119 plasma MDMA levels increased. Please see Table S5-S8 for full results.

120

121 [Supplementary discussion](#)

122 We found a significant order effect on our Trust Investment task, which could suggest that  
123 the effects of MDMA carryover to later testing sessions. This may have relevance for the  
124 psychotherapeutic application of MDMA, whereby drug-assisted sessions are integrated over  
125 subsequent drug-free psychotherapy sessions (Mithoefer et al., 2016). However, in a separate  
126 analysis, there was a significant effect of Session Day: participants were more trusting with  
127 their financial allocations at their second session. This offers an alternative explanation to our  
128 Drug by Order interaction; participants may be simply more willing to invest on their second  
129 visit. This may be related to familiarity, which is recognised as an important component of  
130 economic decision making and may also affect trust (Cao et al., 2011). However, we cannot  
131 determine what caused this effect from our data- a study where drug order is experimentally  
132 manipulated would be necessary. Particularly as no previous laboratory MDMA studies have  
133 found order effects on these tasks, any interpretation of these results must remain tentative.

134

135 In the Public Good Game, our participants donated close to the maximum under placebo, and  
136 over £1 more than the control participants in the Stewart et al (2014) study. Our ability to  
137 detect an effect of MDMA may have therefore been limited. It is interesting to explore our  
138 results for the Ultimatum Game in more detail. In the 'Decider' condition, our participants  
139 were willing to accept 37% of the total stake under placebo, 34% of the total stake under  
140 MDMA. Brandts and Charness (2011) argue that the method we used elicits less punishment  
141 than the 'direct-response' method used by Gabay et al. (2018). Our results would align with  
142 this, given that offers of below 40% of the total stake are not considered 'fair' (Gabay et al.,

143 2014). Interestingly, the participants in Gabay et al. (2018) made lower proposals (48.2% of  
144 the total stake in the placebo condition in vs 62.5% of the total stake in our placebo condition;  
145 55.7% in the MDMA condition vs 69.5% in our MDMA condition). Again, this may have limited  
146 our ability to detect an effect of MDMA increasing generosity or reducing punishment.

147

148 We found a trend for a negative correlation between plasma MDMA levels at two hours and  
149 empathic response ratings on the “Sad” stories. Given that we found no effect of drug on this  
150 task, we cannot draw any firm conclusions from this trend result. However, it is interesting to  
151 see a correlation between a biological measure and a psychological effect that has been  
152 previously noted – that MDMA reduces the impact of negative stimuli (Carhart-Harris et al.,  
153 2014; Frye et al., 2014). This would merit further study.

#### 154 **Further limitations**

155 We used a novel task for our measure of empathy, as opposed to a more validated method  
156 such as the Multifaceted Empathy Test. Thus, our task may have lacked sensitivity to detect  
157 an effect of MDMA. As we had limited power, we were also not able to assess the impact of  
158 sex differences, which have been noted as relevant in MDMA research (Allott and Redman,  
159 2007).



Table S1 Recent and lifetime drug history

|                                            | Min  | Max  | Median | Interquartile range (IQR) | N  |
|--------------------------------------------|------|------|--------|---------------------------|----|
| <b>Recent drug use</b>                     |      |      |        |                           |    |
| Alcohol (weekly units)                     | 0    | 35   | 13     | 3-19                      | 21 |
| Cigarettes (daily number)                  | 0    | 3    | 0      | 0-1                       | 21 |
| Cigarettes (days since last use)           | 0.75 | 2920 | 2      | 551.83                    | 9  |
| Cannabis (days since last use)             | 2    | 8760 | 90     | 1455                      | 19 |
|                                            |      |      |        |                           |    |
| <b>Lifetime drug use (number of times)</b> |      |      |        |                           |    |
| MDMA                                       | 1    | 200  | 10     | 3-45                      | 21 |
|                                            |      |      |        |                           |    |
| Cannabis                                   | 0    | 1000 | 150    | 20-500                    | 21 |
| LSD                                        | 0    | 500  | 1      | 0-5.5                     | 21 |
| Psilocybin                                 | 0    | 100  | 1      | 0-10                      | 21 |
| Ketamine                                   | 0    | 200  | 1      | 0-17.5                    | 21 |
| Mephedrone                                 | 0    | 30   | 0      | 0-4                       | 21 |
| Amphetamine                                | 0    | 150  | 0      | 0-35                      | 21 |
| Cocaine                                    | 0    | 200  | 4      | 0-20                      | 21 |

Table S2 Task results with mean values (standard deviation) reported.

| <b>Empathic Stories<br/>Task emotional<br/>response rating</b>           | <b>MDMA</b>            | <b>Placebo</b>         | <b>JZS Bayes<br/>Factor</b> |
|--------------------------------------------------------------------------|------------------------|------------------------|-----------------------------|
| "Happy" story                                                            | 2.786<br>(1.347)       | 2.857<br>(1.296)       | 5.821                       |
| "Sad" story                                                              | 7.476<br>(1.308)       | 7.405<br>(1.633)       | 5.898                       |
| "Angry" story                                                            | 5.786<br>(1.210)       | 6.381<br>(0.773)       | 1.101                       |
| <b>Trustworthy Face<br/>Rating</b>                                       |                        |                        |                             |
| Female Face                                                              | 4.071<br>(0.450)       | 3.923<br>(0.525)       | 1.837                       |
| Male Face                                                                | 3.927<br>(0.585)       | 3.890<br>(0.690)       | 5.768                       |
| <b>Trust Investment<br/>Task (amount<br/>invested out of<br/>£10000)</b> |                        |                        |                             |
|                                                                          | 4740.095<br>(2413.100) | 5424.000<br>(2429.796) | 1.780                       |

|                             | Baseline 0 hour  | 2 hours post     | 4 hours post     | Baseline 0 hour  | 2 hours post     | 4 hours post     | Drug                                                                            | Time                                                                            | Drug x Time                                                                  | Drug x Time x Order                                               | Time 0 (MDMA vs placebo)                           | Time 2 (MDMA vs placebo)                         | Time 4 (MDMA vs placebo)                         | MDMA (Time 0 vs 2), Time 0 vs 4                                                                  | Placebo (Time 0 vs 2, time 0 vs 4)                                      |
|-----------------------------|------------------|------------------|------------------|------------------|------------------|------------------|---------------------------------------------------------------------------------|---------------------------------------------------------------------------------|------------------------------------------------------------------------------|-------------------------------------------------------------------|----------------------------------------------------|--------------------------------------------------|--------------------------------------------------|--------------------------------------------------------------------------------------------------|-------------------------------------------------------------------------|
| <b>General drug effects</b> |                  |                  |                  |                  |                  |                  |                                                                                 |                                                                                 |                                                                              |                                                                   |                                                    |                                                  |                                                  |                                                                                                  |                                                                         |
| Euphoria                    | 1.250<br>(2.023) | 6.750<br>(2.653) | 2.200<br>(2.353) | 1.550<br>(2.481) | 1.050<br>(1.820) | 0.500<br>(1.192) | <b>F<sub>1,19</sub>=39.594</b><br><b>p&lt;0.001</b> $\eta_p^2$<br><b>=0.676</b> | <b>F<sub>2,38</sub>=29.128</b><br><b>p&lt;0.001</b> $\eta_p^2$<br><b>=0.605</b> | <b>F<sub>2,38</sub>=44.519 p&lt;0.001</b><br>$\eta_p^2$ <b>=0.701</b>        | F <sub>2,36</sub> =1.012<br>p=0.373 $\eta_p^2$<br>=0.053          | t <sub>19</sub> =-0.645<br>p=0.527                 | <b>t<sub>19</sub>=9.194</b><br><b>p&lt;0.001</b> | <b>t<sub>19</sub>=3.448</b><br><b>p=0.003</b>    | <b>t<sub>19</sub>=-8.197</b><br><b>p&lt;0.001</b> ; t <sub>19</sub> =-<br><b>1.900 p=0.218</b>   | t <sub>19</sub> =1.190 p=0.745;<br>t <sub>19</sub> =2.303 p=0.098       |
| Drug effect                 | 0.250<br>(1.118) | 6.500<br>(2.838) | 3.100<br>(3.059) | 0.250<br>(1.118) | 0.600<br>(1.698) | 0.400<br>(1.273) | <b>F<sub>1,19</sub>=57.031</b><br><b>p&lt;0.001</b> $\eta_p^2$<br><b>=0.750</b> | <b>F<sub>2,38</sub>=43.406</b><br><b>p&lt;0.001</b> $\eta_p^2$<br><b>=0.696</b> | <b>F<sub>2,38</sub>=43.125</b><br><b>p&lt;0.001</b> $\eta_p^2$ <b>=0.694</b> | F <sub>2,36</sub> =1.431<br>p=0.252 $\eta_p^2$<br>=0.074          | Identical ratings<br>at time 0 for<br>MDMA/placebo | <b>t<sub>19</sub>=9.035</b><br><b>p&lt;0.001</b> | <b>t<sub>19</sub>=4.212</b><br><b>p&lt;0.001</b> | <b>t<sub>19</sub>=-9.585</b><br><b>p&lt;0.001</b> ; t <sub>19</sub> =-<br><b>4.222, p=0.001</b>  | t <sub>19</sub> =-1.159<br>p=0.780; t <sub>19</sub> =-<br>1.000 p=0.990 |
| Jaw clenching               | 0.750<br>(1.803) | 4.750<br>(3.291) | 2.950<br>(3.137) | 1.550<br>(2.523) | 1.200<br>(2.191) | 0.750<br>(1.410) | <b>F<sub>1,19</sub>=23.339</b><br><b>p&lt;0.001</b> $\eta_p^2$<br><b>=0.551</b> | <b>F<sub>2,38</sub>=17.933</b><br><b>p&lt;0.001</b> $\eta_p^2$<br><b>=0.486</b> | <b>F<sub>2,38</sub>=14.812 p&lt;0.001</b><br>$\eta_p^2$ <b>=0.438</b>        | F <sub>2,36</sub> =1.821<br>p=0.176 $\eta_p^2$<br>=0.092          | t <sub>19</sub> =-1.670,<br>p=0.111                | <b>t<sub>19</sub>=5.007</b><br><b>p&lt;0.001</b> | <b>t<sub>19</sub>=4.104,</b><br><b>p=0.001</b>   | <b>t<sub>19</sub>=-5.540,</b><br><b>p&lt;0.001</b> ; t <sub>19</sub> =-<br><b>3.443, p=0.008</b> | t <sub>19</sub> =1.129 p=0.819;<br>t <sub>19</sub> =1.848, p=0.241      |
| Energy                      | 6.300<br>(2.130) | 6.950<br>(2.964) | 6.300<br>(2.386) | 6.350<br>(1.814) | 5.900<br>(2.049) | 5.600<br>(2.458) | F <sub>1,19</sub> =3.228<br>p=0.088<br>$\eta_p^2$ =0.145                        | F <sub>2,38</sub> =0.601<br>p=0.553 $\eta_p^2$<br>=0.031                        | F <sub>2,38</sub> =.677 p=0.514<br>$\eta_p^2$ =0.034                         | F <sub>2,36</sub> =1.262<br>p=0.295 $\eta_p^2$<br>=0.066          |                                                    |                                                  |                                                  |                                                                                                  |                                                                         |
| <b>Prosocial effects</b>    |                  |                  |                  |                  |                  |                  |                                                                                 |                                                                                 |                                                                              |                                                                   |                                                    |                                                  |                                                  |                                                                                                  |                                                                         |
| Trusting of others          | 2.000<br>(1.947) | 2.150<br>(2.346) | 1.850<br>(1.954) | 1.550<br>(1.761) | 1.750<br>(1.773) | 1.750<br>(1.916) | F <sub>1,19</sub> =0.679<br>p=0.420<br>$\eta_p^2$ =0.035                        | F <sub>2,38</sub> =0.266<br>p=0.768<br>$\eta_p^2$ =0.014                        | F <sub>2,38</sub> =0.211 p=0.811<br>$\eta_p^2$ =0.011                        | F <sub>2,36</sub> = 0.344<br>p=0.711<br>$\eta_p^2$ =0.019         |                                                    |                                                  |                                                  |                                                                                                  |                                                                         |
| Empathy                     | 5.53<br>(2.195)  | 6.630<br>(2.733) | 5.950<br>(2.297) | 5.050<br>(2.121) | 5.110<br>(2.447) | 5.00<br>(2.333)  | F <sub>1,19</sub> =10.073<br>p= 0.005<br>$\eta_p^2$ =0.359                      | F <sub>1,410,25,384</sub> =2.20<br>2 p=0.143<br>$\eta_p^2$ =0.109               | F <sub>2,36</sub> =1.792 p=0.181<br>$\eta_p^2$ =0.091                        | F <sub>1,799,30,590</sub> =0.21<br>3 p=0.787<br>$\eta_p^2$ =0.012 |                                                    |                                                  |                                                  |                                                                                                  |                                                                         |
| Friendly                    | 1.700<br>(2.273) | 1.050<br>(2.188) | 1.500<br>(2.626) | 1.750<br>(2.197) | 2.050<br>(2.417) | 1.750<br>(2.173) | F <sub>1,19</sub> =0.944<br>p=0.343<br>$\eta_p^2$ =0.047                        | F <sub>2,38</sub> =0.260<br>p=0.752<br>$\eta_p^2$ =0.014                        | F <sub>1,349,25,629</sub> =2.073<br>p=0.158 $\eta_p^2$ =0.098                | F <sub>1,375,24,756</sub> =<br>1.238 p=0.293<br>$\eta_p^2$ =0.064 |                                                    |                                                  |                                                  |                                                                                                  |                                                                         |
| Closeness to others         | 4.900<br>(2.049) | 6.400<br>(2.909) | 5.350<br>(2.601) | 4.250<br>(2.447) | 4.600<br>(2.722) | 5.300<br>(2.227) | F <sub>1,19</sub> =6.013<br>p=0.024<br>$\eta_p^2$ =0.240                        | F <sub>2,38</sub> =3.719<br>p=0.033<br>$\eta_p^2$ =0.164                        | <b>F<sub>2,38</sub>=8.010 p=0.001</b><br>$\eta_p^2$ <b>=0.297</b>            | F <sub>2,36</sub> =2.056<br>p=0.143 $\eta_p^2$<br>=0.103          | <b>t<sub>19</sub>=2.218</b><br><b>p=0.039</b>      | <b>t<sub>19</sub>=3.636</b><br><b>p=0.002</b>    | t <sub>19</sub> =0.108<br>p=0.915                | <b>t<sub>19</sub>=-2.941</b><br><b>p=0.025</b> ; t <sub>19</sub> =-<br>1.014 p=0.971             | t <sub>19</sub> =-0.837 p=1.00;<br>t <sub>19</sub> =-2.365<br>p=0.087   |
| Amicable                    | 2.400<br>(2.798) | 1.800<br>(2.949) | 1.900<br>(2.532) | 1.800<br>(2.093) | 1.900<br>(2.245) | 1.955<br>(2.139) | F <sub>1,19</sub> =.167<br>p=0.687<br>$\eta_p^2$ =0.009                         | F <sub>2,38</sub> =0.387<br>p=0.682<br>$\eta_p^2$ =0.020                        | F <sub>1,338,25,414</sub> =0.666<br>p=0.464 $\eta_p^2$ =0.034                | F <sub>1,324,23,829</sub> =0.38<br>2 p=0.601<br>$\eta_p^2$ =0.021 |                                                    |                                                  |                                                  |                                                                                                  |                                                                         |
| Want to be with others      | 5.550<br>(1.791) | 7.050<br>(2.328) | 6.450<br>(2.012) | 5.550<br>(1.820) | 5.600<br>(1.536) | 5.40<br>(1.984)  | F <sub>1,19</sub> =4.046<br>p=0.059 $\eta_p^2$<br>=0.176                        | F <sub>2,38</sub> =3.460<br>p=0.042 $\eta_p^2$<br>=0.154                        | F <sub>1,310,24,894</sub> =2.660<br>p=0.107 $\eta_p^2$ =0.123                | F <sub>1,278,23,003</sub><br>=0.291 p=0.651<br>$\eta_p^2$ =0.016  |                                                    |                                                  |                                                  |                                                                                                  |                                                                         |
| Compassionate               | 3.320<br>(2.583) | 2.160<br>(2.968) | 2.740<br>(2.746) | 3.420<br>(2.610) | 3.260<br>(2.579) | 3.840<br>(2.522) | F <sub>1,16</sub> =8.041<br>p=0.011 $\eta_p^2$<br>=0.309                        | F <sub>2,38</sub> =3.767<br>p=0.033 $\eta_p^2$<br>=0.173                        | F <sub>2,36</sub> =2.295 p=0.115<br>$\eta_p^2$ =0.113                        | F <sub>2,34</sub> =0.624,<br>p=0.542,<br>$\eta_p^2$ =0.035        |                                                    |                                                  |                                                  |                                                                                                  |                                                                         |

Table S3 Subjective Effects- Acute – mean (standard deviation) self-ratings VAS 0-10 of MDMA and placebo groups at pre-drug 0 hour, 2 hour post-drug, 4 hour post-drug and test statistics (F and t) for RM-ANOVA and post-hoc pairwise comparisons (Bonferroni-corrected). When required, F tests were Greenhouse-Geisser corrected. The  $\alpha$  for the F test was Bonferroni corrected by dividing by 11 to give  $\alpha=0.0045$ . Significant results are highlighted in **bold**.

|                                                   | MDMA             |                  | Placebo          |                  | F ( $\alpha = 0.01$ )                              |                                                                                                  |                                                      |                                                      |                                                                 | t | JZS Bayes Factor |
|---------------------------------------------------|------------------|------------------|------------------|------------------|----------------------------------------------------|--------------------------------------------------------------------------------------------------|------------------------------------------------------|------------------------------------------------------|-----------------------------------------------------------------|---|------------------|
|                                                   | Baseline 0 hour  | 3 days post-drug | Baseline 0 hour  | 3 days post-drug | Drug                                               | Day                                                                                              | Drug x Day                                           | Drug x Day x Order                                   | Baseline vs Day 3                                               |   |                  |
| Happy – sad (n=17)                                | 2.240<br>(2.251) | 2.240<br>(1.522) | 2.060<br>(1.784) | 2.120<br>(2.088) | $F_{1,16}=0.282$ $p=0.603$<br>$\eta_p^2 = 0.017$   | $F_{1,16}=0.011$ $p=0.919$<br>$\eta_p^2 = 0.001$                                                 | $F_{1,16}=0.008$ $p=0.930$<br>$\eta_p^2 = 0.001$     | $F_{1,15}=0.011$ $p=0.919$<br>$\eta_p^2 = 0.001$     |                                                                 |   | 5.443            |
| Calm – anxious (n=17)                             | 3.000<br>(2.208) | 1.940<br>(1.435) | 2.710<br>(1.993) | 1.880<br>(1.900) | $F_{1,16}=0.269$ $p=0.611$<br>$\eta_p^2 = 0.017$   | <b><math>F_{1,16}=11.506</math></b><br><b><math>p=0.004</math> <math>\eta_p^2 = 0.418</math></b> | $F_{1,16}=0.119$ $p=0.735$<br>$\eta_p^2 = 0.007$     | $F_{1,15}=1.031$ $p=0.326$<br>$\eta_p^2 = 0.064$     | <b><math>t_{16}=3.397</math></b><br><b><math>p=0.004</math></b> |   | 1.110            |
| Trusting of others - Distrusting of others (n=16) | 1.940<br>(2.048) | 2.130<br>(1.746) | 1.880<br>(1.928) | 2.370<br>(1.668) | $F_{1,15}=0.064$ $p=0.804$<br>$\eta_p^2 = 0.004$   | $F_{1,15}=1.076$ $p=0.316$<br>$\eta_p^2 = 0.067$                                                 | $F_{1,15}=0.311$ $p=0.585$<br>$\eta_p^2 = 0.020$     | $F_{1,14}=0.063$ ,<br>$p=0.806$ , $\eta_p^2 = 0.004$ |                                                                 |   | 4.992            |
| Want to be alone - Want to be with others (n=16)  | 5.690<br>(1.493) | 5.810<br>(1.721) | 5.250<br>(0.775) | 5.750<br>(1.238) | $F_{1,15}=0.732$ $p=0.406$<br>$\eta_p^2 = 0.047$   | $F_{1,15}=0.940$ $p=0.348$<br>$\eta_p^2 = 0.059$                                                 | $F_{1,15}=0.368$ $p=0.553$<br>$\eta_p^2 = 0.024$     | $F_{1,14}=0.776$ $p=0.393$<br>$\eta_p^2 = 0.052$     |                                                                 |   | 5.161            |
| No empathy – extreme empathy (n=16)               | 5.500<br>(1.592) | 5.440<br>(1.931) | 5.310<br>(1.662) | 5.310<br>(1.991) | $F_{1,15}=0.701$ $p=0.416$<br>$\eta_p^2 = 0.045$   | $F_{1,15}=0.007$ $p=0.935$<br>$\eta_p^2 = 0.000$                                                 | $F_{1,15}=0.011$ , $p=0.917$<br>$\eta_p^2 = 0.001$   | $F_{1,14}=5.939$ $p=0.029$<br>$\eta_p^2 = 0.298$     |                                                                 |   | 5.241            |
| BDI (n=15)                                        | 2.130<br>(3.114) | 1.270<br>(2.344) | 1.330<br>(1.877) | 1.400<br>(2.473) | $F_{1,14}=0.459$ $p=0.509$ ,<br>$\eta_p^2 = 0.032$ | $F_{1,14}=0.599$ , $p=0.452$ ,<br>$\eta_p^2 = 0.041$                                             | $F_{1,14}=0.876$ , $p=0.365$ ,<br>$\eta_p^2 = 0.059$ | $F_{1,13}=0.100$ $p=0.756$<br>$\eta_p^2 = 0.008$     |                                                                 |   | 3.096            |

Table S4 - Subacute effects, comparison of pre-drug baseline on acute days vs 3 days post drug. JZS Bayes Factor are calculated from t-statistic comparing pre-MDMA and 3 days post-MDMA results. The  $\alpha$  for the F test was Bonferroni corrected to 0.01.

Table S5 Correlations between plasma MDMA levels and Task results.  $\alpha = 0.005$

|                                        |                  | Trust Investment Task | Public Good Game | Dictator Game | Ultimatum Game |         | Trustworthiness rating |              | Empathic stories task |        |        |
|----------------------------------------|------------------|-----------------------|------------------|---------------|----------------|---------|------------------------|--------------|-----------------------|--------|--------|
|                                        |                  |                       |                  |               | Proposer       | Decider | Male faces             | Female faces | Happy                 | Sad    | Angry  |
| Plasma MDMA levels (2 hours post-drug) | Pearson <i>r</i> | -0.116                | -0.305           | -0.015        | 0.014          | 0.226   | -0.339                 | -0.381       | 0.280                 | -0.550 | -0.221 |
|                                        | <i>p</i>         | 0.616                 | 0.190            | 0.950         | 0.953          | 0.339   | 0.123                  | 0.080        | 0.245                 | 0.015  | 0.364  |

Table S6 Correlations between plasma MDMA levels and Mood & Symptom VAS results.  $\alpha = 0.01$

|                                               |                         | <b>Euphoria</b> | <b>Jaw clenching</b> | <b>Feel drug effect</b> | <b>Closeness to others</b> |
|-----------------------------------------------|-------------------------|-----------------|----------------------|-------------------------|----------------------------|
| <b>Plasma MDMA levels (2 hours post-drug)</b> | <b>Pearson <i>r</i></b> | -0.161          | 0.334                | -0.029                  | -0.109                     |
|                                               | <b><i>p</i></b>         | 0.497           | 0.150                | 0.902                   | 0.646                      |

Table S7 Correlations between VAS measured 'Trust' at 2 hours post-drug and task-measured trust.  $\alpha = 0.008$

| Trusting VAS            | Trustworthiness rating |              | Trust investment |
|-------------------------|------------------------|--------------|------------------|
|                         | Male faces             | Female faces |                  |
| <b>Pearson <i>r</i></b> | -0.478                 | -0.322       | -0.029           |
| <b><i>p</i></b>         | 0.028                  | 0.154        | 0.904            |

Table S8 Correlations between VAS measured 'Empathy' at 2 hours post-drug and task-measured empathy.  $\alpha = 0.008$

| Empathy VAS      | Empathic stories task |       |       |
|------------------|-----------------------|-------|-------|
|                  | Happy                 | Angry | Sad   |
| Pearson <i>r</i> | 0.255                 | 0.020 | 0.162 |
| <i>p</i>         | 0.264                 | 0.932 | 0.483 |



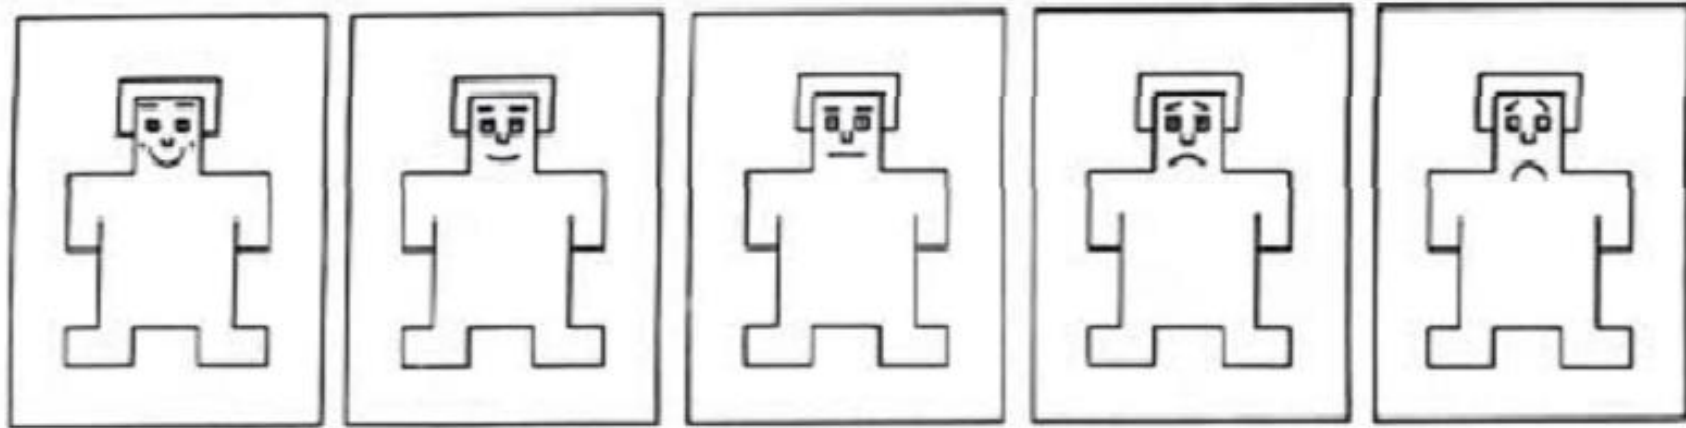

Figure S1 Self-assessment Manikin - participants could choose 1 - 9, including space between specific manikins, to correspond to the positivity or negativity of the emotion they felt in response to the task. Figure adapted from Bradley & Lang 1994.

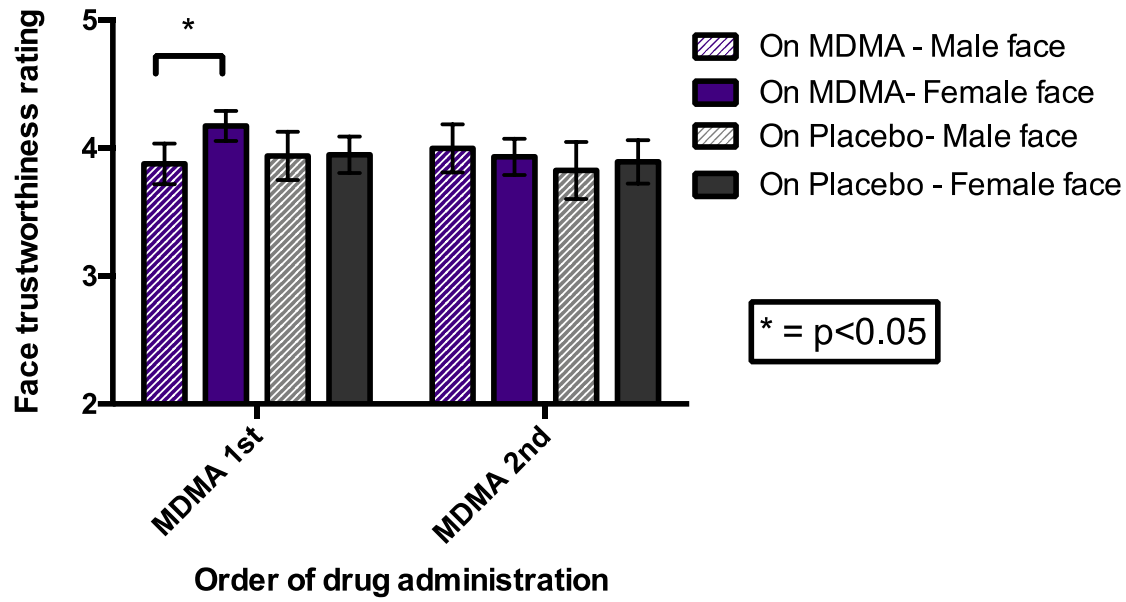

Figure S1 Face trustworthiness ratings are affected by session order. Participants rate female faces highest post-MDMA, but only when this is their first session within the study.  $*=p<0.05$

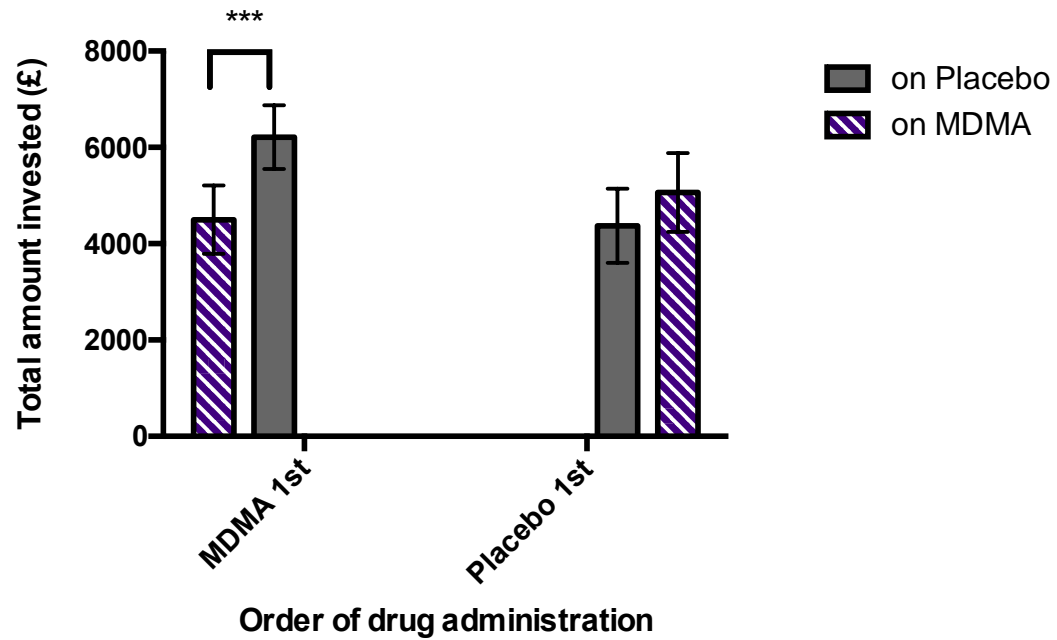

Figure S3. Trust Investment (a trust-related behaviour) is affected by drug order, with participants investing more money post-placebo when they had received MDMA at their previous session.

This can alternatively be explained by an overall greater investment on the second visit compared to the first visit. \*\*\*=  $p=0.001$

## References

- Allott K and Redman J. (2007) Are there sex differences associated with the effects of ecstasy/3,4-methylenedioxymethamphetamine (MDMA)? *Neuroscience & Biobehavioral Reviews* 31: 327-347.
- Berg J, Dickhaut J and McCabe K. (1995) Trust, Reciprocity, and Social History. *Games and Economic Behavior* 10: 122-142.
- Bradley MM and Lang PJ. (1994) Measuring emotion: the Self-Assessment Manikin and the Semantic Differential. *J Behav Ther Exp Psychiatry* 25: 49-59.
- Brandts J and Charness G. (2011) The strategy versus the direct-response method: a first survey of experimental comparisons. *Experimental Economics* 14: 375-398.
- Cao H, Han B, Hirshleifer D, et al. (2011) Fear of the Unknown: Familiarity and Economic Decisions. *Review of Finance* 15: 173-206.
- Carhart-Harris RL, Wall MB, Erritzoe D, et al. (2014) The effect of acutely administered MDMA on subjective and BOLD-fMRI responses to favourite and worst autobiographical memories. *The International Journal of Neuropsychopharmacology* 17: 527-540.
- Dziobek I, Rogers K, Fleck S, et al. (2008) Dissociation of cognitive and emotional empathy in adults with Asperger syndrome using the Multifaceted Empathy Test (MET). *J Autism Dev Disord* 38: 464-473.
- Frye CG, Wardle MC, Norman GJ, et al. (2014) MDMA decreases the effects of simulated social rejection.
- Gabay AS, Carhart-Harris RL, Mazibuko N, et al. (2018) Psilocybin and MDMA reduce costly punishment in the Ultimatum Game. *Scientific Reports* 8: 8236-8236.
- Gabay AS, Kempton MJ, Gilleen J, et al. (2019) MDMA Increases Cooperation and Recruitment of Social Brain Areas When Playing Trustworthy Players in an Iterated Prisoner's Dilemma. *The Journal of Neuroscience* 39: 307-320.
- Gabay AS, Radua J, Kempton MJ, et al. (2014) The Ultimatum Game and the brain: a meta-analysis of neuroimaging studies. *Neurosci Biobehav Rev* 47: 549-558.
- Guth W and Tietz R. (1990) *Ultimatum Bargaining Power*: North-Holland Pub. Co.
- Hoffman E, McCabe K, Smith VL, et al. (1996) Social Distance and Other-Regarding Behavior in Dictator Games. *American Economic Review* 86: 653-660.
- Kosfeld M, Heinrichs M, Zak PJ, et al. (2005) Oxytocin increases trust in humans. *Nature* 435: 673-676.
- Mehrabian A and Epstein N. (1972) A measure of emotional empathy. *J Pers* 40: 525-543.
- Mithoefer MC, Grob CS and Brewerton TD. (2016) Novel psychopharmacological therapies for psychiatric disorders: psilocybin and MDMA. *The Lancet Psychiatry* 3: 481-488.
- Stewart LH, Ferguson B, Morgan CJA, et al. (2014) Effects of ecstasy on cooperative behaviour and perception of trustworthiness: A naturalistic study. *Journal of Psychopharmacology* 28: 1001-1008.
- Thaler RH. (1988) Anomalies: The Ultimatum Game. *Journal of Economic Perspectives* 2: 195-206.
